# Supplementary material for: PADI4 Polymorphisms Confer Risk of Anti-CCP-Positive Rheumatoid Arthritis in Synergy With HLA-DRB1*04 and Smoking
Source: Frontiers journal article supplement (doi:10.3389/fimmu.2021.707690), 2021-10-18
Supplement: Image_1.pdf [file Image_1.pdf]

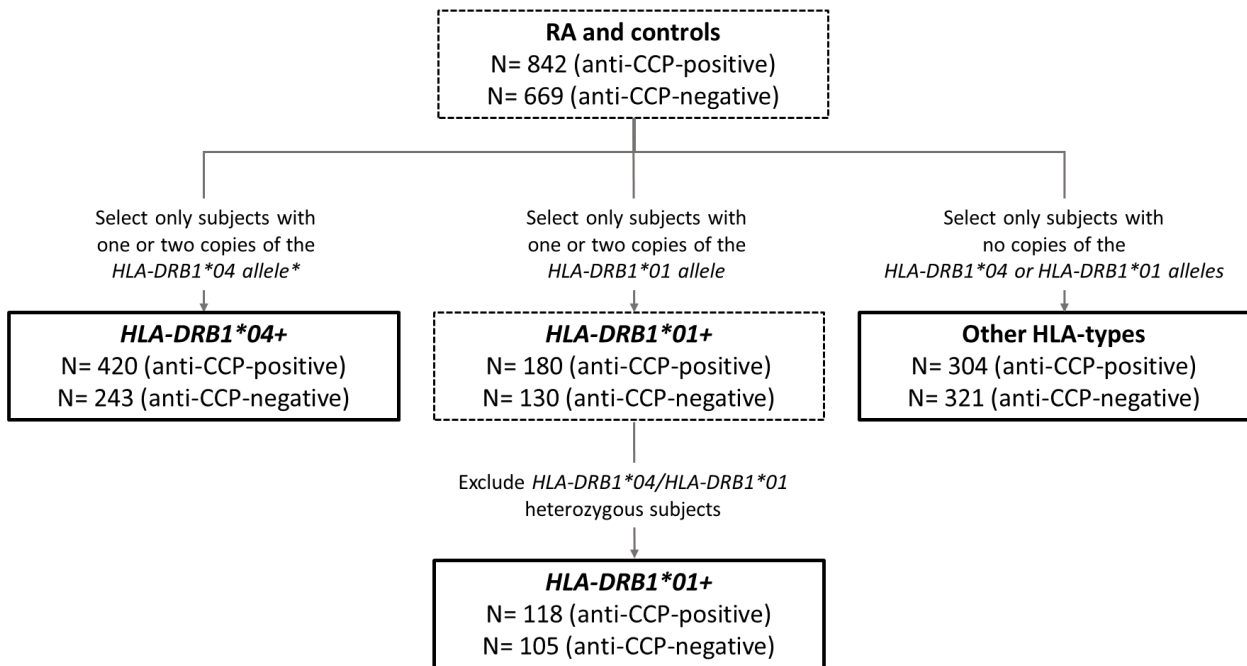

**Supplementary figure 1:** Procedure followed for the stratification of the Danish cohort based on HLA-type. Black full line boxes represented the three final groups for analyses presented in Table 3. \*= grouping includes HLA-DRB1\*04/HLA-DRB1\*01 heterozygous subjects.
